1           **Human AdV-20-42-42, a promising novel adenoviral vector for gene**  
2                                   **therapy and vaccine product development**

3  
4   Mónika Z. Ballmann<sup>1</sup>, Svjetlana Raus<sup>2,#</sup>, Ruben Engelhart<sup>1,2</sup>, Győző L. Kaján<sup>3,\*</sup>, Chantal van  
5   der Zalm<sup>1</sup>, Tibor Papp<sup>4,\*</sup>, Lijo John<sup>3,+</sup>, Selina Khan<sup>4</sup>, Jerome Custers<sup>4</sup>, Wilfried A.M. Bakker<sup>1</sup>,  
6   Hilde M. van der Schaar<sup>1</sup>, Niklas Arnberg<sup>3</sup>, Angelique A.C. Lemckert<sup>1</sup>, Menzo Havenga<sup>1</sup>,  
7   Andrew H. Baker<sup>2</sup>

8

9   **Affiliations:**

10   <sup>1</sup>Batavia Biosciences B.V., Leiden, The Netherlands

11   <sup>2</sup>Centre for Cardiovascular Sciences, University of Edinburgh, Little France Crescent,  
12   Edinburgh, UK

13   <sup>3</sup>Department of Clinical Microbiology, Division of Virology, Umeå University, Sweden

14   <sup>4</sup>Janssen Vaccines and Prevention B.V., Leiden, The Netherlands

15

16   <sup>#</sup>Present address: Department of Medicine, Division of Hepatology, Albert Einstein College of  
17   Medicine, Bronx, New York

18   <sup>\*</sup>Present address: Institute for Veterinary Medical Research, Centre for Agricultural Research,  
19   Budapest, Hungary

20   <sup>+</sup>Present address: National Veterinary Institute, Uppsala, Sweden

21

22   **Running title:** A novel adenoviral vector for product development

23

24   **Keywords:** Novel adenovirus serotype; Expression vector, Low seroprevalence; Cell and  
25   tissue transduction, Potent T-cell responses

26 **Corresponding author:**

27 Andrew H. Baker

28 Centre for Cardiovascular Sciences, University of Edinburgh,

29 Little France Crescent, Edinburgh, UK

30 E-mail : [Andy.Baker@ed.ac.uk](mailto:Andy.Baker@ed.ac.uk)

31 **ABSTRACT**

32 Pre-existing immune responses towards adenoviral vector limit the use of a vector based on  
33 particular serotypes and its clinical applicability for gene therapy and/or vaccination.  
34 Therefore, there is a significant interest to vectorize novel adenoviral types that have low  
35 seroprevalence in the human population. Here, we describe the discovery and vectorization of  
36 a chimeric human adenovirus, which we call HAdV-20-42-42. Full genome sequencing  
37 revealed that this virus is closely related to human serotype 42, except for the penton-base  
38 which is derived from serotype 20. The HAdV-20-42-42 vector could be propagated stably to  
39 high titers on existing E1-complementing packaging cell lines. Receptor binding studies  
40 revealed that the vector utilized both CAR and CD46 as receptors for cell entry. Furthermore,  
41 the HAdV-20-42-42 vector was potent in transducing human and murine cardiovascular cells  
42 and tissues, irrespective of the presence of blood coagulation factor X. In addition, the vector  
43 did not sequester in the liver upon intravenous administration in rodents. Finally, we  
44 demonstrate that potent T-cell responses against vector-delivered antigens could be induced  
45 upon vaccination. In summary, from the data obtained we conclude that HAdV-20-42-42  
46 provides a valuable addition to the portfolio of adenoviral vectors available to develop safe and  
47 efficacious products in the fields of gene therapy and vaccination.

48

49 **IMPORTANCE**

50 Adenoviral vectors are currently under investigation for a broad range of therapeutic  
51 indications in diverse fields, such as oncology and gene therapy, as well as for vaccination both  
52 for human and veterinary use. A wealth of data shows that pre-existing immune responses may  
53 limit the use of a vector. Particularly in the current climate of global pandemic, there is a need  
54 to expand the toolbox with novel adenoviral vectors for vaccine development. Our data  
55 demonstrates that we have successfully vectorized a novel adenovirus serotype with low

56 seroprevalence. The cell transduction data and antigen-specific immune responses induced *in*  
57 *vivo* demonstrate that this vector is highly promising for the development of gene therapy and  
58 vaccine products.

## 59 INTRODUCTION

60 Adenoviral vectors have been studied for decades as they hold great promise as tools to develop  
61 safe and effective gene therapy and vaccine products. As such, there are dozens of therapeutic  
62 applications being pursued utilizing adenoviral vectors. As it has been amply demonstrated that  
63 host immune responses limit the repeated use of a particular vector (1-4) there is a constant  
64 demand to identify new adenovirus (AdV) serotypes with low seroprevalence, and alternate  
65 tropism. Thus, investigations into the *in vitro* and *in vivo* biology of less prevalent adenovirus  
66 may advance the clinical use of alternative Ad-based platforms.

67 To date 57 human adenovirus (HAdV) serotypes have been described and are sub-  
68 grouped in 7 species (HAdV A-G), of which HAdV-D is the largest. It has been well-  
69 documented that the members of the different species are associated with diverse clinical  
70 symptoms, including gastroenteritis (HAdV-F and -G), respiratory disease (HAdV-B, C, and  
71 E), or conjunctivitis and/or keratitis (HAdV-B and -D). HAdV-induced symptoms can either  
72 be self-limiting and cleared by a host within days to weeks, but persistent infection of HAdV-  
73 C can last for months. Serotype classification is historically based on the unique neutralization  
74 profile of an adenovirus, i.e. serum specifically raised against one serotype does not cross-  
75 neutralize other adenovirus serotypes, and a hemagglutination profile. Besides the 57  
76 acknowledged serotypes, many hybrid adenoviruses have been discovered and as these so-  
77 called chimeras can be neutralized by parental serum they do not qualify as distinct serotypes.  
78 Most likely such hybrids originate from homologous recombination events between two or  
79 more viruses replicating simultaneously in a host cell during co-infection (5-8).

80 In the present study we describe the generation of a novel replication-incompetent  
81 vector based on a natural hybrid that we named HAdV-20-42-42. The recombinant HAdV-20-  
82 42-42 vector was used for characterization of its seroprevalence, receptor usage, and tropism.  
83 In addition, we explored the utility of the vector as a potential tool to develop gene therapy and

84 vaccine products. The data obtained and described here warrant further studies into the  
85 utilization of the HAdV-20-42-42 vector to develop vaccines and cardiovascular intervention  
86 strategies.

## 87 **RESULTS**

### 88 **Identification of HAdV-20-42-42, a natural chimera**

89 In order to identify possible new vector candidates, e.g. new and/or rare human adenovirus  
90 types, 281 human adenovirus strains isolated from patients in Sweden between 1978 and 2010  
91 were screened previously (9). From these samples, the hexon, the penton base, and the  
92 polymerase genes were amplified and sequenced to allow for identification of new adenovirus  
93 types or possible recombinants. Strains with interesting genotypes were propagated on A549  
94 cells, after which the complete viral genome was sequenced using Next-Generation Sequencing  
95 and annotated based on HAdV reference strains. Phylogenetic analyses were conducted based  
96 on the complete genome sequence and amino acid translations of the hexon, penton base, and  
97 the fiber knob.

98 During the screening process, strain 212 was pinpointed and analyzed further. The  
99 complete genome sequence of this strain was 35,187 bp long with a GC-content of 57.0%. A  
100 typical HAdV-D genome layout was observed with 37 protein coding sequences and two virus-  
101 associated RNAs (Figure 1A), pointing to a recombination event of two types that resulted in  
102 a hybrid. The strain is closest related to HAdV-42 (species *Human mastadenovirus D*) in most  
103 phylogenetic analyses except for the penton base, which has the highest sequence identity with  
104 HAdV-20 (Figure 1B). Thus, the genomic composition of strain 212 was determined as HAdV-  
105 20-42-42 concerning the sequence of the penton base, the hexon, and the fiber knob.

106

### 107 **HAdV-20-42-42 shows low seroprevalence in human subjects**

108 High levels of pre-existing anti-vector humoral immunity in vaccine target populations may  
109 hamper potential use of a novel adenoviral vector as an efficacious vaccine platform, such as  
110 found for HAdV-5-based vectors (10-12). We investigated the levels of pre-existing  
111 neutralizing antibodies against HAdV-20-42-42 using a panel of serum samples ( $n=103$ ) taken

112 from a cohort of healthy >50-year-old US citizens. In line with previous findings (13), ~60%  
113 of the serum samples exhibited high levels of neutralizing activity (effective at dilutions  
114 >1:200) against HAdV-5 (Fig. 2). For HAdV-35 and HAdV-20-42-42 on the other hand only  
115 ~15% of serum samples neutralized viral activity at dilutions >200 (Fig. 2). These data indicate  
116 that the seroprevalence of HAdV-20-42-42 in this cohort was low with antibody levels  
117 comparable to that of the rare serotype HAdV-35 (species HAdV-B).

118

### 119 **Vectorization of HAdV-20-42-42**

120 In order to study the therapeutic applicability of HAdV-20-42-42, we first generated  
121 replication-incompetent vectors expressing reporter genes  $\beta$ -galactosidase (LacZ), luciferase  
122 (Luc) or Enhanced Green Fluorescent Protein (EGFP). To do so, engineered HAdV-20-42-42  
123 genomic DNA sequences were cloned into three plasmids, called the adaptor plasmid, the  
124 intermediate plasmid, and the right-end plasmid, with overlapping regions to allow for  
125 homologous recombination events (see Figure 3A). To produce replication-incompetent  
126 reporter viruses, the E1 region of HAdV-20-42-42 was replaced with an expression cassette  
127 and a reporter gene in the adaptor plasmid. In the right-end plasmid, the E3 region was deleted  
128 to create capacity for insertion of larger transgenes. To enhance the growth in a standard  
129 producer cell line (i.e. HAdV-5 E1-complementing HEK293 cells), the native E4 ORF6/7  
130 region was exchanged with that of HAdV-5 (13-15).

131 Reconstruction of the full-length recombinant HAdV-20-42-42 vector encoding the  
132 various reporter genes was achieved by homologous recombination via co-transfection of the  
133 three plasmids into HEK293 cells. After co-transfection, the HEK293 cells were subjected to  
134 a freeze-thaw cycle to release intracellular particles. After removal of cell debris by  
135 centrifugation, the supernatant was used for a reinfection of fresh HEK293 cells. At 3 days  
136 post-re-infection of the fresh HEK293 cells cytopathic effect (CPE) was observed (Figure 3B)



137 and viral progeny were successfully propagated to high titers and purified with CsCl density  
138 gradients. The reporter gene expression was detected successfully in infected cells (Figure 3C).

139

#### 140 **Characterization of HAdV-20-42-42 receptor usage**

141 Well-studied adenovirus gene therapy or vaccination vectors (e.g. HAdV-5, HAdV-26 and  
142 HAdV-35) bind their fibers to CD46, coxsackie and adenovirus receptor (CAR) or desmoglein  
143 2 (DSG2) as high affinity receptors, while their penton bases interact with  $\alpha$ v-integrins as co-  
144 receptors for internalization (16). HAdV-20-42-42 clusters to a small group of HAdV-Ds,  
145 which have been previously shown to utilize subunits of sialic acid as primary receptors for  
146 cellular attachment and/or entry. To investigate the receptor usage, we determined the  
147 transduction capacity of HAdV-20-42-42-Luc in various cell lines, expressing or lacking CAR,  
148 sialic acid-containing glycans, DSG2, or CD46 isoforms, by measuring the luciferase levels  
149 after infection. Similar to HAdV-5, HAdV-20-42-42 efficiently transduced CHO-CAR cells,  
150 but was also able to transduce Chinese hamster ovary (CHO) cells lacking the CAR receptor  
151 albeit at a much lower efficiency (Fig. 4A), suggesting that it may also utilize other receptors.

152         Although being exploited by other HAdV-D members for infection, the presence of  
153 sialic acid on cells did not increase the transduction capacity of HAdV-20-42-42. Levels of  
154 DSG2 in monocytes also did not affect the luciferase expression of HAdV-20-42-42 (Fig. 4A).  
155 Next, the transduction efficiency was evaluated in CHO cells expressing various isoforms of  
156 CD46 (Fig. 4B). CHO-K1 cells, which lack CD46, were poorly transduced by HAdV-20-42-  
157 42. While HAdV-5 interacted with all CD46 isoforms as well as with CHO-K1 cells, HAdV-  
158 20-42-42 preferentially used the C2 receptor isoform of CD46 for infection (Fig. 4B). Together,  
159 these findings indicate that the novel adenoviral vector HAdV-20-42-42 is able to bind to both  
160 CAR and CD46 receptors, primarily the C2 isoform. As these receptors are present in many

161 cell types, this warrants a broad use of the novel adenoviral vector HAdV-20-42-42 in gene  
162 therapy.

163

#### 164 **HAdV-20-42-42 vector interactions with serum and coagulation factors**

165 The binding of many HAdV types to human coagulation blood factor X (FX) significantly  
166 affects the transduction *in vitro* and the tropism *in vivo* following intravenous (i.v.)  
167 administration (10, 17, 18). We investigated whether the presence of FX impacts the  
168 transduction efficiency of HAdV-20-42-42. Physiological concentrations of FX were incubated  
169 with cells prior to the addition of HAdV-5, -35, or HAdV-20-42-42 luciferase vectors, and  
170 intracellular luciferase levels were measured 2 days after transduction. While HAdV-35  
171 transduction was only marginally affected by the addition of FX, the luciferase levels of  
172 HAdV-5 and in particular of HAdV-20-42-42 were substantially increased in the presence of  
173 FX (Fig. 5A). These data show a notably higher transduction potential of HAdV-20-42-42 over  
174 HAdV-5 and HAdV-35 in human saphenous vein endothelial cells (HSVEC) in the presence  
175 of FX. HSVEC were infected with HAdV-20-42-42-LacZ and HAdV-5-LacZ as a control. At  
176 all doses tested, the percentage of LacZ-positive cells was higher for HAdV-20-42-42  
177 compared to HAdV-5 (Fig. 5B). These data show that HAdV-20-42-42 was capable of  
178 efficiently transducing vascular cells in the presence of FX.

179

#### 180 **HAdV-20-42-42 biodistribution following systemic delivery *in vivo***

181 To characterize the HAdV-20-42-42 vectors *in vivo* following intravenous administration, we  
182 evaluated the biodistribution patterns of HAdV-20-42-42-Luc using a previously described  
183 mouse model (19, 20). Animals inoculated with vehicle (PBS) or HAdV-5-Luc were included  
184 as negative and positive control groups, respectively. Pretreatment with clodronate liposomes  
185 (CL+) was performed on half of the animals in order to deplete macrophages, thereby reducing

186 possible sequestration of the adenovirus vector to the liver and allowing a more efficient  
187 evaluation of the biodistribution at the whole organism level. Two days after vector  
188 administration, the animals were imaged to visualize luciferase levels (Fig. 6A). Subsequently,  
189 the mice were sacrificed and several organs were collected for adenoviral DNA quantification  
190 (Fig. 6B).

191 In the control group of animals without CL pretreatment, HAdV-5-Luc was mainly  
192 distributed in liver and spleen at the levels of  $\sim 2.5 \times 10^5$  genome copy numbers per 100 ng total  
193 DNA, while in the group pre-treated with CL the liver and spleen distribution was higher, closer  
194 to  $\sim 5 \times 10^5$  genome copy numbers (Fig. 6). HAdV-20-42-42 on the other hand appeared to  
195 have only a spleen tropism, since luciferase activity was not detected in other organs. As  
196 expected, the total DNA copy number was significantly higher when CL was added ( $\sim 2.5 \times$   
197  $10^6$ ) in comparison to the group without CL pretreatment ( $1 \times 10^5$ ).

198 Collectively, these data indicate that HAdV-20-42-42 has a good safety profile with  
199 only spleen tropism found in the studies, while the adenoviral DNA copies in other organs  
200 tested were poorly detectable.

201

## 202 **HAdV-20-42-42 as a candidate vaccine vector**

203 The potential of HAdV-20-42-42 as a vaccine vector candidate was assessed for its ability to  
204 induce cellular immune responses against a model antigen (Luciferase, Luc) in Balb/c mice  
205 after intramuscular immunization. The vector was compared side-by-side with a benchmark  
206 vector based on HAdV-26, which has undergone clinical trials for HIV, Ebola, and recently for  
207 SARS-coronavirus-2 (21-24). Mice were immunized intramuscularly with two different doses  
208 of E1- and E3-deleted HAdV-26 vector expressing luciferase (HAdV-26-Luc) or HAdV-20-  
209 42-42-Luc. Mice were sacrificed and sampled for serum and splenocytes two weeks after the  
210 prime immunization. Cellular immune responses against the vector-encoded antigen was

211 evaluated by Luc specific-IFN- $\gamma$  ELISPOT assay. To this end, splenocytes sampled from  
212 immunized mice were stimulated overnight with a 15mer overlapping Luc peptide pool. The  
213 antigen specific immune responses were determined by measuring the relative number of IFN-  
214  $\gamma$ -secreting cells (Fig. 7A). As expected, no Luc specific responses were detected against the  
215 empty adenovectors lacking luciferase (HAdV-26.E). Furthermore, the results show that the  
216 cellular immune responses induced by HAdV-20-42-42 were comparable to the response seen  
217 for HAdV-26 at the highest immunization dose ( $10^{10}$  VP).

218 For their potential utility as new adenoviral vaccine vectors, the novel HAdV-20-42-42  
219 adenoviral vector would preferably be serologically distinct from existing adenoviral vectors  
220 currently in development as vaccine vectors, such as HAdV-26. Therefore, cross-neutralization  
221 tests were performed between the novel HAdV-20-42-42 adenoviral vector and HAdV-26. To  
222 this end, mice antisera raised against these vectors during the immunization study described  
223 above were cross-tested against both vectors in an adenovirus neutralization assay. The  
224 adenovirus neutralization assay was carried out as described previously (25). Briefly, starting  
225 from a 1:16 dilution, the sera were 2-fold serially diluted, then pre-mixed with the adenoviral  
226 vectors expressing luciferase (Luc), and subsequently incubated overnight with A549 cells at  
227 a multiplicity of infection (MOI) of 500. Luciferase activity levels in infected cell lysates  
228 measured 24 hours post-infection represented vector infection efficiencies. Neutralization titers  
229 against a given vector were defined as the highest serum dilution capable of giving a 90%  
230 reduction of vector infection efficiency. The neutralization titers were arbitrarily divided into  
231 the following categories: <16 (no neutralization), 16.1 to 200 (low cross-neutralization), 201  
232 to 2,000 (cross-neutralization), and >2,001 (strong cross-neutralization).

233 The results show no major cross-neutralization between the vectors tested (Fig. 7B),  
234 but a low, one-way cross-neutralization was observed with HAdV-26 antiserum displaying a

235 neutralization titer against HAdV-20-42-42 of 23. Thus, the new adenoviral vector HAdV-20-  
236 42-42 displayed low, if any, cross-neutralization with the human adenoviral vector HAdV-26.

## 237 DISCUSSION

238 We present the first report on the generation of a replication-incompetent HAdV-20-42-42  
239 vector and present data on initial *in vitro* and *in vivo* characterization. Our serum neutralization  
240 studies using wildtype HAdV-20-42-42 virus demonstrated that this virus displayed low  
241 seroprevalence in a random set of sera derived from healthy US subjects. Low seroprevalence  
242 has been an important criterium to select a virus for vector development, as it has been amply  
243 demonstrated that the transduction capability of the vector can be hampered in the presence of  
244 a high titer of neutralizing antibodies (26).

245         Based on these initial data we set out to generate a vector system based on HAdV-20-  
246 42-42. We created a flexible three plasmid system to support HAdV-20-42-42 vector  
247 generation, allowing for the convenient insertion of transgenes into a multiple cloning site. The  
248 wildtype HAdV-20-42-42 E4ORF6 region was replaced with that of Ad5, a technique that we  
249 previously adopted for the generation of other species HAdV-D viruses including HAdV-26,  
250 HAdV-48, HAdV-49 and HAdV-56 vectors. This replacement allowed for their successful  
251 production in Ad5 E1-complementing cells such as HEK293 and PER.C6<sup>®</sup> (13, 27, 28) and  
252 enabled us to manufacture high quality, high titer HAdV-20-42-42 vectors carrying diverse  
253 inserts, which paves the road for large scale clinical productions.

254         Previous studies have demonstrated that HAdV-D strains can employ CAR, CD46,  
255 sialic acid-containing glycans and  $\alpha$ v-integrins as entry receptors (16). In accordance with this,  
256 we demonstrate here that HAdV-20-42-42 utilizes CAR and CD46 as receptors. Similar to  
257 HAdV-26 and HAdV-48, this virus interacts with blood coagulation factors (10). Together with  
258 data demonstrating that HAdV-20-42-42 bypasses the liver, resulting in the absence of  
259 hepatotoxicity, as well as the high transduction efficiency of cardiovascular cells *in vitro*, these  
260 findings suggest that this vector is potentially well suited to develop cardiovascular gene  
261 therapy approaches although further *in vivo* studies are required to develop this concept in

262 more detail. In addition, the data obtained from our vaccination experiments suggest that this  
263 vector is capable of eliciting potent insert specific T-cell responses at similar levels as  
264 compared to a HAdV-26 vector. The HAdV-26 vector platform has recently been successfully  
265 used to develop a potent and safe vaccine against Ebola and this vaccine has been approved for  
266 human use by European regulatory authorities. In addition, this vector is being tested for the  
267 development of preventive vaccines against HIV, RSV and more recently SARS-CoV-2 (21,  
268 22, 29). In preclinical tests, HAdV-26 used alone was demonstrated to induce robust humoral  
269 and cellular immunity, plus it has been well tolerated in humans while eliciting target specific  
270 immunity in phase I-III trials. We were interested to test cross-neutralization between both D  
271 viruses to assess whether subsequent use of these vectors would be a possibility. Our data  
272 demonstrate that serum from HAdV-26 does not neutralize our HAdV-20-42-42 and vice versa.

273 To summarize, our studies into the HAdV-20-42-42 chimera demonstrate that we have  
274 identified a promising novel adenoviral vector to pursue both gene therapy and vaccine  
275 applications and therefore warrant further preclinical and clinical studies utilizing this vector.

## 276 MATERIALS AND METHODS

### 277 Origin and sequencing of HAdV-20-42-42

278 Strain 212 was isolated in the Skåne University Hospital, Lund, Sweden in 1978 (9). To obtain  
279 the complete genome sequence, it was propagated on human alveolar epithelial cells (A549),  
280 and the intracellular viral DNA was purified from infected cells (30). The genome was  
281 sequenced using Ion Torrent next-generation sequencing at the Uppsala Genome Center of the  
282 National Genomics Infrastructure (SciLifeLab; Uppsala, Sweden). The resulting reads were  
283 normalized to a 60-times coverage using BBNorm from the BBTools suite. The normalized  
284 reads were assembled *de novo* using Mira v4.9.5\_2 (31), and the original sequence reads were  
285 mapped to the resulting consensus sequence using the Geneious mapper at the highest  
286 sensitivity with five iterations in Geneious 9.1.8 (32). After mapping the sequence reads to the  
287 *de novo* assembly, the final read coverage minimum was 51, the mean was 1048.4, and the read  
288 coverage's standard deviation was 274.5. The new consensus sequence was annotated based  
289 on HAdV reference strain genome annotations, using the Annotate & Predict function of  
290 Geneious. The annotations were checked manually and edited. The genome sequence was  
291 submitted to the NCBI Nucleotide database with accession number MW694832.

292

### 293 Phylogenetic analysis

294 Phylogenetic analyses were conducted based on the complete genome sequence and derived  
295 amino acid sequences of the entire hexon and penton base; and also on hexon loop 1 (delimited  
296 according to Yuan et al. (33)) and the fiber knob. For phylogenetic tree inference, multiple  
297 alignments were conducted using MAFFT (34), and phylogenetic calculations were performed  
298 using RAxML-NG v0.9.0 (35) based on alignments edited in trimAl v1.2 (36). Evolutionary  
299 model selection was performed using ModelTest-NG v0.1.5 (37). The robustness of the trees  
300 was determined with a non-parametric bootstrap calculation using 1,000 repeats. Phylogenetic



301 trees were visualized using MEGA 7 (38), trees were rooted on the midpoint, and bootstrap  
302 values are given as percentages if they reached 75%. Recombination events were analyzed  
303 using SimPlot v3.5.1 (39).

304

### 305 **HAdV seroneutralization**

306 Serological inhibition of HAdV-20-42-42, HAdV-35 and HAdV-5 transduction was evaluated  
307 over a collection of 103 serum samples from a cohort of healthy >50-year-old US citizens.  
308 Seroneutralization assays were performed using the protocol described in Sprangers *et al.* (25).  
309 Briefly, serum samples were heat-inactivated at 56 °C for 60 min, and then twofold dilutions  
310 were performed in a 96-well tissue culture plate. The dilutions covered a range from 1/16 to  
311 1/4096 in an end volume of 50 µl DMEM. Negative controls consisted of DMEM alone. After  
312 addition of 50 µl virus solution ( $1 \times 10^8$  VP ml<sup>-1</sup>) to each well, a cell suspension ( $10^4$  A549 cells)  
313 was added to the well to a final volume of 200 µl. Following 24 h incubation, the luciferase  
314 activity in the cells was measured using a Steady-Glo luciferase reagent system (Promega).  
315 The neutralization titers were defined as the maximum serum dilution that neutralized 90% of  
316 luciferase activity.

317

### 318 **Cell lines**

319 HEK293 (human embryonic kidney cells: ATCC CRL-1573) were grown in Dulbecco's  
320 modified Eagle's medium (DMEM) supplemented with 10% foetal bovine serum (FBS; Gibco,  
321 UK). A549 (human lung epithelial carcinoma: ATCC CCL-185) cells were grown in RPMI-  
322 1640, supplemented with 10% FBS, 1% penicillin/streptomycin (P/S), 1% L-glutamine  
323 (Gibco) and 1% Na-Pyr (Sigma, UK). Chinese hamster ovary (CHO) cells (40), CHO-CAR  
324 (40), various CHO-CD46 cells (41) were grown as described before. TC1-DSG2 cells, a kind

325 gift of dr. A Lieber (University of Washington, Seattle, WA, USA), were grown in RPMI  
326 supplemented with 10% FBS and 20 mM HEPES.

327

### 328 **Construction of replication-incompetent recombinant HAd-20-42-42 vectors**

329 The wild-type HAd-20-42-42 virus was plaque purified and propagated on HEK293 cells and  
330 purified by cesium chloride (CsCl) density gradient centrifugation. From the purified virus  
331 material full genomic DNA was isolated which served as starting material for the construction  
332 of the HAdV-20-42-42 plasmids.

333

### 334 **HAdV-20-42-42 cloning system**

335 The HAdV-20-42-42 vector construction strategy was based on a three-plasmid system with  
336 sufficient homology between each of the plasmids to enable homologous recombination *in*  
337 *vitro* following the co-transfection in HAdV-5 E1-complementing HEK293 cells. Adapter  
338 plasmids that contain the left end of the HAdV-20-42-42 genome with E1 deletions and include  
339 either luciferase, EGFP or LacZ reporter genes, were generated first. Briefly, the adapter  
340 plasmid pAdApt20-42-42 (nt 1–461 of WT HAdV-20-42-42) contained the left inverted  
341 terminal repeat (ITR) and included an expression cassette consisting of a CMV promoter  
342 followed by a multiple cloning site, encompassing Luc, GFP or LacZ, and the SV40 poly(A)  
343 signal. This plasmid also contained the wild-type HAdV-20-42-42 nucleotides (nt) 3361-5908  
344 to allow homologous recombination in HEK293 cells, with the intermediate plasmid carrying  
345 the HAdV-20-42-42 genome from IVa2 to L3 genes (nt 2088 to 18494). The right-end plasmid  
346 contained the HAdV-20-42-42 genome from L3 gene to the right ITR (nt 15373 to 35187) and  
347 had a deletion for the E3 region, while the HAdV-5 E4-ORF6 replaced the HAdV-20-42-42  
348 E4-ORF6. The E3 region was deleted by PCR and standard cloning techniques exploiting a  
349 natural AscI site in the viral genome. To replace the native ORF6/7 by the homologue region

350 of HAdV-5, three fragments were amplified by PCR. Two were designed to cover the region  
351 upstream and downstream from the ORF6/7 to be replaced. A third PCR was performed to  
352 obtain the HAdV-5 ORF6/7 (HAdV-5 GenBank accession no. M73260 nt 32963–34077) and  
353 partly overlapping with the other two PCR products. These three PCR products were then  
354 subjected to fusion PCR and cloned into the plasmid backbone to obtain the final right-end  
355 plasmid.

356

### 357 **Generation and production of HAdV-20-42-42-based adenoviral vectors**

358 Adenoviral vectors HAdV-20-42-42-LacZ, HAdV-20-42-42-Luc and HAdV-20-42-42-GFP  
359 were generated by co-transfection of E1-complementing HEK293 cells with the adaptor  
360 plasmid, intermediate plasmid and the right-end plasmid. Prior to transfection into HEK293  
361 cells, the three plasmids were digested with PacI to release the respective adenoviral vector  
362 genome fragments. The transfections were performed using Lipofectamine transfection reagent  
363 (Invitrogen; Carlsbad, CA) according to the manufacturer's instructions. After harvesting of  
364 the viral rescue transfections, the viruses were further amplified by several successive infection  
365 rounds on HEK293 cell cultures. The viruses were purified from crude viral harvests using a  
366 two-step cesium chloride (CsCl) density gradient ultracentrifugation procedure as described  
367 before (14). Viral particle (VP) titers were measured by a spectrophotometry-based procedure  
368 described previously (42).

369

### 370 **Viral transduction assays**

371 The transduction assay was performed on 96 well tissue culture plates (Costar). HSVEC were  
372 seeded at  $1 \times 10^4$  cells/well. The following day monolayers were washed with PBS and viral  
373 vectors, either encoding the luciferase or  $\beta$ -galactosidase gene, were added at the indicated  
374 VP/cell concentrations in their corresponding media without serum. In the experiments in

375 which blood coagulation factor FX was used, this was pre-incubated with the vector for 30 min  
376 at 37 °C prior to addition to the cells. The FX coagulation factor was purchased from  
377 Cambridge Bioscience and used at a physiological concentration of 10 µg/ml. After 3 h  
378 incubation at 37 °C, the cells were washed and fresh medium supplemented with 10% FBS  
379 was added, after which the cells were incubated for 48 h. For the readout of  $\beta$ -galactosidase  
380 gene expression, staining of the cells was performed using Galacto-Light Plus Assay Kit  
381 (Thermo Fisher Scientific). For the readout of luciferase activity, the plates were washed with  
382 PBS and the cells were lysed with 1× reporter lysis buffer (100 µl per well; Promega).  
383 Following a freeze-thaw cycle, luciferase (Luciferase assay system, Promega) measurements  
384 were performed with 20 µl of lysed cells in white opaque plates (Greiner BioOne) following  
385 the manufacturer's instructions. The BCA protein quantitation assays (Thermo Fisher  
386 Scientific) were performed with 20 µl lysed cells. The results were recorded in a Victor X  
387 multilabel plate reader (Perkin-Elmer). The transduction level was expressed as luminescence  
388 relative light units per mg of protein per well (RLU/mg). All of the assays were performed with  
389 four replicates of samples.

390

### 391 **Receptor usage assays**

392 Studies of receptor usage were performed using CHO cells, which were expressing (positive)  
393 or lacking (negative) for receptors of interest. The cells (CHO-CAR, CHO-sialic acid, CHO-  
394 DSG and CHO-CD46 (K1, BC1, BC2, C1 and C2) were seeded as four replicates in 96-well  
395 tissue culture plates and infected with HAdV-20-42-42-Luc or HAd5-Luc at a concentration of  
396  $1 \times 10^4$  VP /cell. Cell cultures were incubated 3 h at 37 °C with 5% CO<sub>2</sub>. Luciferase levels were  
397 measured at 48-72 hours post-infection with Victor X Multilabel plate reader (Perkin Elmer)  
398 following the manufacturer's instructions. Luciferase transgene expression was presented as

399 luminescence relative light units (RLU) per mg of protein. All assays were performed with four  
400 sample replicates for each experimental condition.

401

### 402 ***In vivo* biodistribution**

403 All animal experiments were fully approved by University of Edinburgh Animal Procedures  
404 and ethics committee and performed under the UK Home Office license in accordance with the  
405 UK Home Office guidelines. Immunocompetent outbred MF1 male mice (Charles Rivers  
406 Laboratories) aged 8-10 weeks were used. The animals were organized in six groups with five  
407 animals in each group, except the control (PBS) groups which had 3 animals. In order to deplete  
408 circulating macrophages and more efficiently evaluate the transit of the virus at the whole  
409 organism level, 200  $\mu$ l of clodronate liposomes (CL) was intravenously (i.v.) administered to  
410 corresponding groups at 48 h prior to virus administration.

411 Treatment groups were i.v. infected with a single dose ( $1 \times 10^{11}$  VP diluted in 100  $\mu$ l  
412 PBS) of HAdV-20-42-42-Luc or HAdV-5-Luc. Matched control groups were injected with 100  
413  $\mu$ l of PBS. At 48 hours post virus delivery, luciferase activity was imaged with the method  
414 IVIS Spectrum (CaliperLife Science, UK). Prior to the imaging procedure, 0.5 ml luciferin was  
415 injected to the mice. Animals were maintained under inhalational anesthesia (AB-G).  
416 Luciferase activity detected ranged from low (shown in blue) to high (shown in red) levels.  
417 After the imaging was completed, animals were sacrificed and their organs (liver, heart, spleen,  
418 kidney, intestine, pancreas and lungs) were collected for the quantification of the vector  
419 genomes as described before (13).

420

### 421 **Mouse immunization study**

422 All animal experimentation was performed according to Dutch law and the Guidelines on the  
423 Protection of Experimental Animals published by the Council of the European Committee. Six-

424 to-eight-week-old specific pathogen-free female Balb/c mice were purchased from Charles  
425 River and kept at the institutional animal facility under specified pathogen-free conditions. For  
426 prime immunization studies mice were immunized intramuscularly with HAdV-20-4-42 or  
427 HAdV-26 vectors ( $1 \times 10^9$  VP or  $1 \times 10^{10}$  VP per mouse) expressing Luc. Two weeks post-  
428 immunization, mice were sacrificed and the induction of Luc-specific IFN $\gamma$ -producing cells  
429 was measured by IFN $\gamma$  ELISPOT. In brief, mouse splenocytes were stimulated with 15-mer  
430 peptide pool spanning Luc (luc pool), medium (control negative) or phorbol myristate acetate  
431 (PMA; positive control).

432 Mice antisera against HAdV-20-42-42 and HAdV-26 were cross-tested against both vectors in  
433 an adenovirus neutralization assay. Starting from a 1:16 dilution, and the sera were 2-fold  
434 serially diluted, as described elsewhere (25).

435

### 436 **Statistical analysis**

437 Statistical analysis was performed with GraphPad Prism software. One-way ANOVA with the  
438 two tailed Student's t-test was used for statistical parameter comparison between different  
439 groups. The parameters of significance are indicated in each figure caption: \* $P < 0.05$ ,  
440 \*\* $P < 0.005$ , \*\*\* $P < 0.001$  and NS, not statistically significant,  $P > 0.05$ . The presented *in*  
441 *vitro* results are averaged data from at least three different experiments with four experimental  
442 replicates per condition. The *in vivo* experiments were performed with a minimum of five  
443 animals per group. Errors bars represent the standard error of the mean (SEM). Statistical  
444 analyses were performed with SAS version 9.4 for Figure 6. Non-inferiority testing across dose  
445 was performed on log<sub>10</sub>-transformed data, with HAdV-26-Luc as a reference and a pre-  
446 specified margin of 0.5 log<sub>10</sub>.

447 **ACKNOWLEDGMENTS**

448 This study was made possible by funding from FP7 Marie Curie Actions via the ADVEC  
449 consortium (grant agreement no.: 324325). This project has received funding from the  
450 European Union's Horizon 2020 research and innovation programme under grant agreement  
451 number 825670. The research of GLK and TP is supported by the National Research,  
452 Development and Innovation Office (OTKA NN128309), and that of GLK also by the János  
453 Bolyai Research Scholarship of the Hungarian Academy of Sciences. The assembly and  
454 phylogenetic calculations were performed using resources provided by KIFÜ, Hungary.

## 455 REFERENCES

- 456 1. Shirley JL, de Jong YP, Terhorst C, Herzog RW. 2020. Immune responses to viral gene therapy  
457 vectors. *Molecular Therapy* 28:709-722.
- 458 2. Singh S, Kumar R, Agrawal B. 2019. Adenoviral vector-based vaccines and gene therapies:  
459 Current status and future prospects. *Adenoviruses*:53.
- 460 3. Sun Y, Lv X, Ding P, Wang L, Sun Y, Li S, Zhang H, Gao Z. 2019. Exploring the functions of  
461 polymers in adenovirus-mediated gene delivery: Evading immune response and redirecting  
462 tropism. *Acta biomaterialia* 97:93-104.
- 463 4. Gao J, Zhang W, Ehrhardt A. 2020. Expanding the Spectrum of Adenoviral Vectors for Cancer  
464 Therapy. *Cancers* 12:1139.
- 465 5. Ismail AM, Cui T, Dommaraju K, Singh G, Dehghan S, Seto J, Shrivastava S, Fedorova NB, Gupta  
466 N, Stockwell TB. 2018. Genomic analysis of a large set of currently—and historically—  
467 important human adenovirus pathogens. *Emerging microbes & infections* 7:1-22.
- 468 6. Robinson CM, Singh G, Lee JY, Dehghan S, Rajaiya J, Liu EB, Yousuf MA, Betensky RA, Jones  
469 MS, Dyer DW, Seto D, Chodosh J. 2013. Molecular evolution of human adenoviruses. *Sci Rep*  
470 3:1812.
- 471 7. Gonzalez G, Koyanagi KO, Aoki K, Watanabe H. 2015. Interregional coevolution analysis  
472 revealing functional and structural interrelatedness between different genomic regions in  
473 human mastadenovirus D. *Journal of virology* 89:6209-6217.
- 474 8. Walsh MP, Chintakuntlawar A, Robinson CM, Madisch I, Harrach B, Hudson NR, Schnurr D,  
475 Heim A, Chodosh J, Seto D. 2009. Evidence of molecular evolution driven by recombination  
476 events influencing tropism in a novel human adenovirus that causes epidemic  
477 keratoconjunctivitis. *PloS one* 4:e5635.
- 478 9. Kaján GL, Lipiec A, Bartha D, Allard A, Arnberg N. 2018. A multigene typing system for human  
479 adenoviruses reveals a new genotype in a collection of Swedish clinical isolates. *PLoS One*  
480 13:e0209038.
- 481 10. Waddington SN, McVey JH, Bhella D, Parker AL, Barker K, Atoda H, Pink R, Buckley SM, Greig  
482 JA, Denby L, Custers J, Morita T, Francischetti IM, Monteiro RQ, Barouch DH, van Rooijen N,  
483 Napoli C, Havenga MJ, Nicklin SA, Baker AH. 2008. Adenovirus serotype 5 hexon mediates liver  
484 gene transfer. *Cell* 132:397-409.
- 485 11. Qiu Q, Xu Z, Tian J, Moitra R, Gunti S, Notkins AL, Byrnes AP. 2015. Impact of natural IgM  
486 concentration on gene therapy with adenovirus type 5 vectors. *J Virol* 89:3412-6.
- 487 12. Alonso-Padilla J, Papp T, Kaján GL, Benkő M, Havenga M, Lemckert A, Harrach B, Baker AH.  
488 2016. Development of Novel Adenoviral Vectors to Overcome Challenges Observed With  
489 HAdV-5-based Constructs. *Mol Ther* 24:6-16.
- 490 13. Duffy MR, Alonso-Padilla J, John L, Chandra N, Khan S, Ballmann MZ, Lipiec A, Heemskerk E,  
491 Custers J, Arnberg N, Havenga M, Baker AH, Lemckert A. 2018. Generation and  
492 characterization of a novel candidate gene therapy and vaccination vector based on human  
493 species D adenovirus type 56. *J Gen Virol* 99:135-147.
- 494 14. Havenga M, Vogels R, Zuijdgeest D, Radosevic K, Mueller S, Sieuwerts M, Weichold F, Damen  
495 I, Kaspers J, Lemckert A, van Meerendonk M, van der Vlugt R, Holterman L, Hone D, Skeiky Y,  
496 Mintardjo R, Gillissen G, Barouch D, Sadoff J, Goudsmit J. 2006. Novel replication-incompetent  
497 adenoviral B-group vectors: high vector stability and yield in PER.C6 cells. *J Gen Virol* 87:2135-  
498 2143.
- 499 15. Nevels M, Spruss T, Wolf H, Dobner T. 1999. The adenovirus E4orf6 protein contributes to  
500 malignant transformation by antagonizing E1A-induced accumulation of the tumor suppressor  
501 protein p53. *Oncogene* 18:9-17.
- 502 16. Arnberg N. 2012. Adenovirus receptors: implications for targeting of viral vectors. *Trends*  
503 *Pharmacol Sci* 33:442-8.



- 504 17. Shayakhmetov DM, Gaggar A, Ni S, Li ZY, Lieber A. 2005. Adenovirus binding to blood factors  
505 results in liver cell infection and hepatotoxicity. *J Virol* 79:7478-91.
- 506 18. Parker AL, Waddington SN, Nicol CG, Shayakhmetov DM, Buckley SM, Denby L, Kemball-Cook  
507 G, Ni S, Lieber A, McVey JH, Nicklin SA, Baker AH. 2006. Multiple vitamin K-dependent  
508 coagulation zymogens promote adenovirus-mediated gene delivery to hepatocytes. *Blood*  
509 108:2554-61.
- 510 19. Coughlan L, Bradshaw AC, Parker AL, Robinson H, White K, Custers J, Goudsmit J, Van Rooijen  
511 N, Barouch DH, Nicklin SA, Baker AH. 2012. Ad5:Ad48 hexon hypervariable region  
512 substitutions lead to toxicity and increased inflammatory responses following intravenous  
513 delivery. *Mol Ther* 20:2268-81.
- 514 20. Bradshaw AC, Coughlan L, Miller AM, Alba R, van Rooijen N, Nicklin SA, Baker AH. 2012.  
515 Biodistribution and inflammatory profiles of novel penton and hexon double-mutant serotype  
516 5 adenoviruses. *J Control Release* 164:394-402.
- 517 21. Milligan ID, Gibani MM, Sewell R, Clutterbuck EA, Campbell D, Plested E, Nuthall E, Voysey M,  
518 Silva-Reyes L, McElrath MJ, De Rosa SC, Frahm N, Cohen KW, Shukarev G, Orzabal N, van  
519 Duijnhoven W, Truysers C, Bachmayer N, Splinter D, Samy N, Pau MG, Schuitemaker H, Luhn K,  
520 Callendret B, Van Hoof J, Douoguih M, Ewer K, Angus B, Pollard AJ, Snape MD. 2016. Safety  
521 and Immunogenicity of Novel Adenovirus Type 26- and Modified Vaccinia Ankara-Vectored  
522 Ebola Vaccines: A Randomized Clinical Trial. *JAMA* 315:1610-23.
- 523 22. Baden LR, Karita E, Mutua G, Bekker LG, Gray G, Page-Shipp L, Walsh SR, Nyombayire J, Anzala  
524 O, Roux S, Laher F, Innes C, Seaman MS, Cohen YZ, Peter L, Frahm N, McElrath MJ, Hayes P,  
525 Swann E, Grunenberg N, Grazia-Pau M, Weijtens M, Sadoff J, Dally L, Lombardo A, Gilmour J,  
526 Cox J, Dolin R, Fast P, Barouch DH, Laufer DS, Group BIHS. 2016. Assessment of the Safety and  
527 Immunogenicity of 2 Novel Vaccine Platforms for HIV-1 Prevention: A Randomized Trial. *Ann*  
528 *Intern Med* 164:313-22.
- 529 23. Mercado NB, Zahn R, Wegmann F, Loos C, Chandrashekar A, Yu J, Liu J, Peter L, McMahan K,  
530 Tostanoski LH. 2020. Single-shot Ad26 vaccine protects against SARS-CoV-2 in rhesus  
531 macaques. *Nature*:1-6.
- 532 24. Poland GA, Ovsyannikova IG, Crooke SN, Kennedy RB. 2020. SARS-CoV-2 Vaccine  
533 Development: Current Status. *Mayo Clin Proc* 95:2172-2188.
- 534 25. Sprangers MC, Lakhai W, Koudstaal W, Verhoeven M, Koel BF, Vogels R, Goudsmit J, Havenga  
535 MJ, Kostense S. 2003. Quantifying adenovirus-neutralizing antibodies by luciferase transgene  
536 detection: addressing preexisting immunity to vaccine and gene therapy vectors. *J Clin*  
537 *Microbiol* 41:5046-52.
- 538 26. Sayedahmed EE, Elkashif A, Alhashimi M, Sambhara S, Mittal SK. 2020. Adenoviral Vector-  
539 Based Vaccine Platforms for Developing the Next Generation of Influenza Vaccines. *Vaccines*  
540 8:574.
- 541 27. Abbink P, Lemckert AA, Ewald BA, Lynch DM, Denholtz M, Smits S, Holterman L, Damen I,  
542 Vogels R, Thorner AR, O'Brien KL, Carville A, Mansfield KG, Goudsmit J, Havenga MJ, Barouch  
543 DH. 2007. Comparative seroprevalence and immunogenicity of six rare serotype recombinant  
544 adenovirus vaccine vectors from subgroups B and D. *J Virol* 81:4654-63.
- 545 28. Lemckert AAC, Grimbergen J, Smits S, Hartkoorn E, Holterman L, Berkhout B, Barouch DH,  
546 Vogels R, Quax P, Goudsmit J, Havenga MJE. 2006. Generation of a novel replication-  
547 incompetent adenoviral vector derived from human adenovirus type 49: manufacture on  
548 PER.C6 cells, tropism and immunogenicity. *J Gen Virol* 87:2891-2899.
- 549 29. Baden LR, Walsh SR, Seaman MS, Tucker RP, Krause KH, Patel A, Johnson JA, Kleinjan J,  
550 Yanosick KE, Perry J, Zablowsky E, Abbink P, Peter L, Iampietro MJ, Cheung A, Pau MG,  
551 Weijtens M, Goudsmit J, Swann E, Wolff M, Loblein H, Dolin R, Barouch DH. 2013. First-in-  
552 human evaluation of the safety and immunogenicity of a recombinant adenovirus serotype  
553 26 HIV-1 Env vaccine (IPCAVD 001). *J Infect Dis* 207:240-7.

- 554 30. Kajon AE, Erdman DD. 2007. Assessment of genetic variability among subspecies B1 human  
555 adenoviruses for molecular epidemiology studies, p 335-355, *Adenovirus methods and*  
556 *protocols*. Springer.
- 557 31. Chevreux B, Wetter T, Suhai S. Genome sequence assembly using trace signals and additional  
558 sequence information, p 45-56. *In* (ed), Citeseer,
- 559 32. Kearse M, Moir R, Wilson A, Stones-Havas S, Cheung M, Sturrock S, Buxton S, Cooper A,  
560 Markowitz S, Duran C, Thierer T, Ashton B, Meintjes P, Drummond A. 2012. Geneious Basic:  
561 an integrated and extendable desktop software platform for the organization and analysis of  
562 sequence data. *Bioinformatics* 28:1647-9.
- 563 33. Yuan X, Qu Z, Wu X, Wang Y, Liu L, Wei F, Gao H, Shang L, Zhang H, Cui H, Zhao Y, Wu N, Tang  
564 Y, Qin L. 2009. Molecular modeling and epitopes mapping of human adenovirus type 3 hexon  
565 protein. *Vaccine* 27:5103-10.
- 566 34. Katoh K, Standley DM. 2013. MAFFT multiple sequence alignment software version 7:  
567 improvements in performance and usability. *Mol Biol Evol* 30:772-80.
- 568 35. Kozlov AM, Darriba D, Flouri T, Morel B, Stamatakis A. 2019. RAXML-NG: a fast, scalable and  
569 user-friendly tool for maximum likelihood phylogenetic inference. *Bioinformatics* 35:4453-  
570 4455.
- 571 36. Capella-Gutierrez S, Silla-Martinez JM, Gabaldon T. 2009. trimAl: a tool for automated  
572 alignment trimming in large-scale phylogenetic analyses. *Bioinformatics* 25:1972-3.
- 573 37. Darriba D, Posada D, Kozlov AM, Stamatakis A, Morel B, Flouri T. 2020. ModelTest-NG: A New  
574 and Scalable Tool for the Selection of DNA and Protein Evolutionary Models. *Mol Biol Evol*  
575 37:291-294.
- 576 38. Kumar S, Stecher G, Tamura K. 2016. MEGA7: Molecular Evolutionary Genetics Analysis  
577 Version 7.0 for Bigger Datasets. *Mol Biol Evol* 33:1870-4.
- 578 39. Lole KS, Bollinger RC, Paranjape RS, Gadkari D, Kulkarni SS, Novak NG, Ingersoll R, Sheppard  
579 HW, Ray SC. 1999. Full-length human immunodeficiency virus type 1 genomes from subtype  
580 C-infected seroconverters in India, with evidence of intersubtype recombination. *J Virol*  
581 73:152-60.
- 582 40. Bergelson JM, Cunningham JA, Droguett G, Kurt-Jones EA, Krithivas A, Hong JS, Horwitz MS,  
583 Crowell RL, Finberg RW. 1997. Isolation of a common receptor for Coxsackie B viruses and  
584 adenoviruses 2 and 5. *Science* 275:1320-3.
- 585 41. Liszewski MK, Atkinson JP. 1996. Membrane cofactor protein (MCP; CD46). Isoforms differ in  
586 protection against the classical pathway of complement. *J Immunol* 156:4415-21.
- 587 42. Maizel Jr JV, White DO, Scharff MD. 1968. The polypeptides of adenovirus: I. Evidence for  
588 multiple protein components in the virion and a comparison of types 2, 7A, and 12. *Virology*  
589 36:115-125.

590

591 **FIGURES**

592

593 **A**

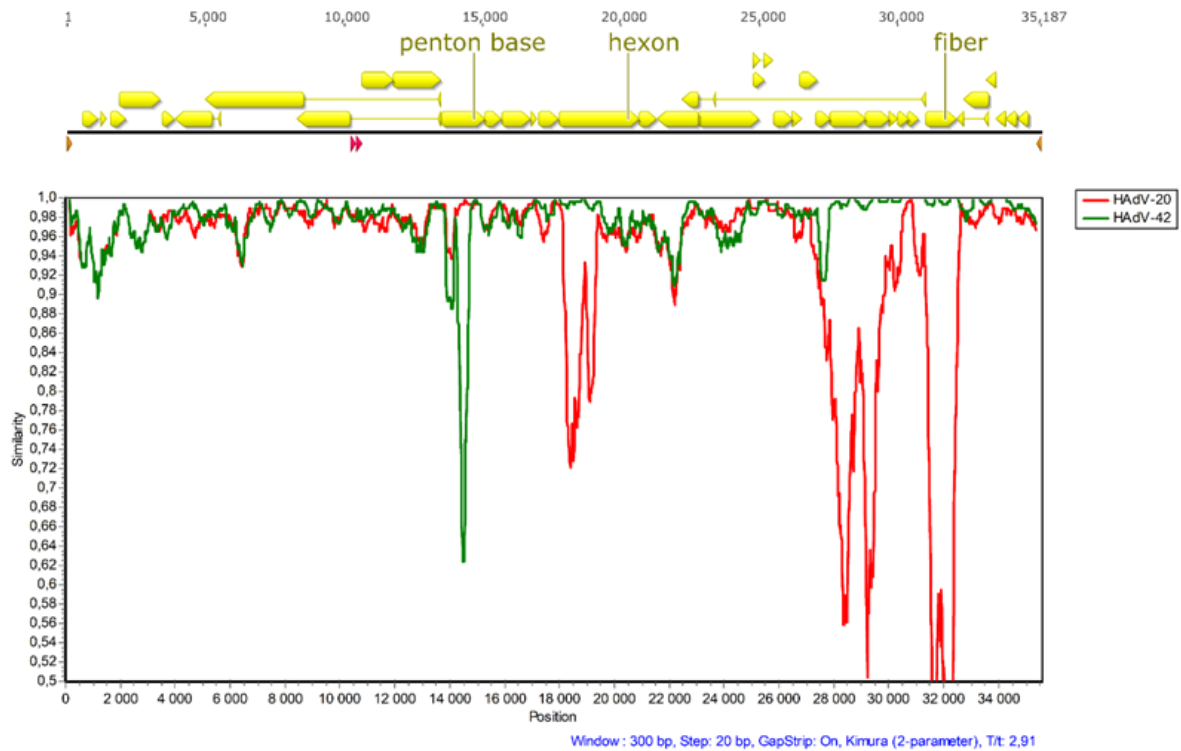

594

595 **Figure 1A. Identification of HAdV-20-42-42, a natural chimera.**

596 A) Yellow arrows in the genome map represent protein coding sequences, red arrows represent  
597 virus associated RNAs and brown arrows represent the inverted terminal repeats. In the  
598 SimPlot analysis, sequence identities to human adenovirus 20 and -42 are represented by red  
599 and green plots, respectively.

600 **B**

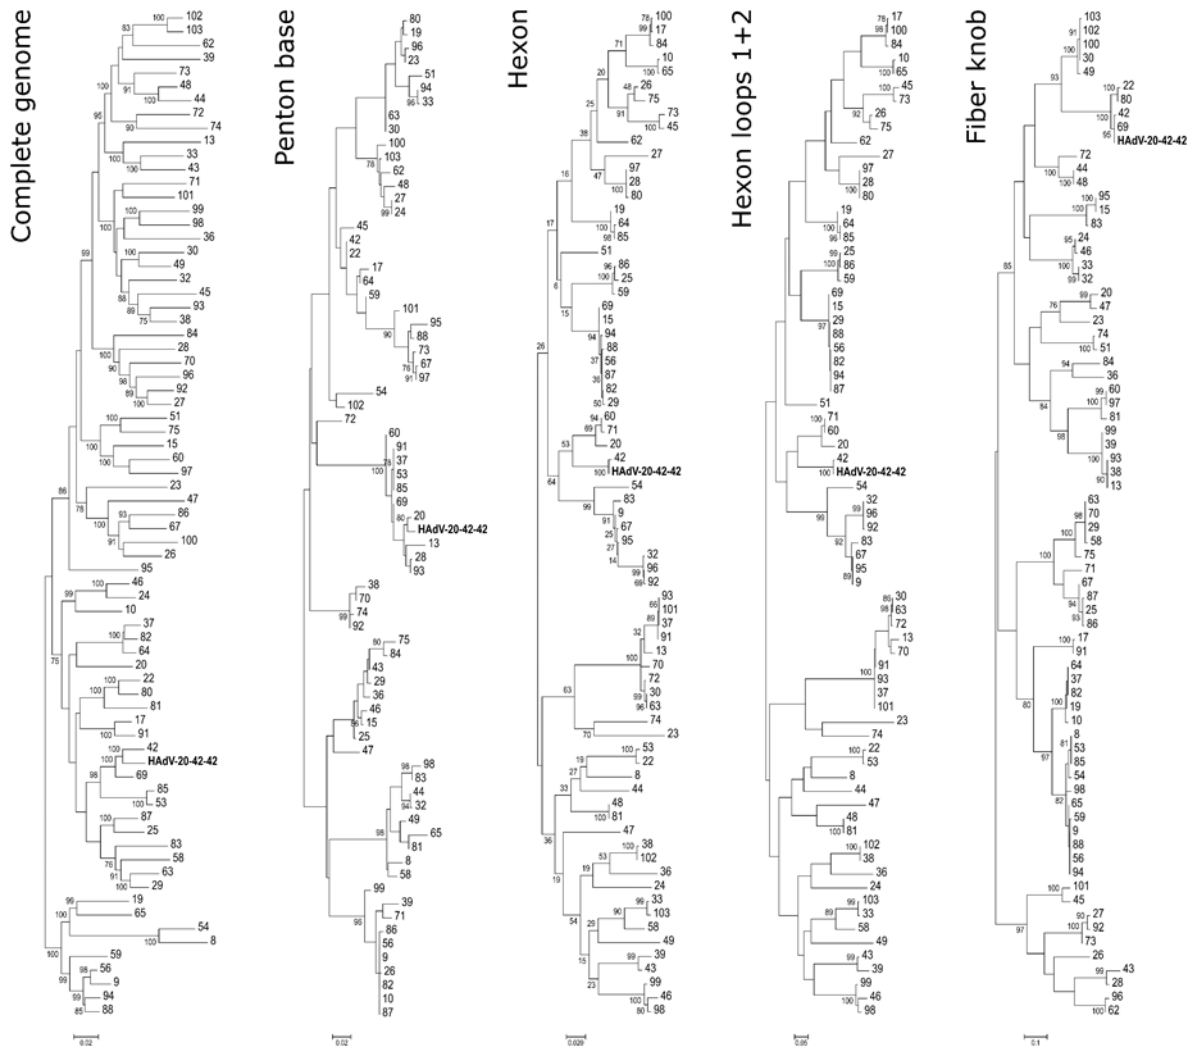

601

602 **Figure 1B. Identification of HAdV-20-42-42, a natural chimera.**

603 **B)** Phylogenetic analysis of strain 212 (Umu009) based on the complete genome sequence and  
604 derived amino acid sequences of the hexon, the penton base, the hexon loop 1 and the fiber  
605 knob. *Human mastadenovirus D* reference strains are represented by their serotype- or  
606 genotype numbers.

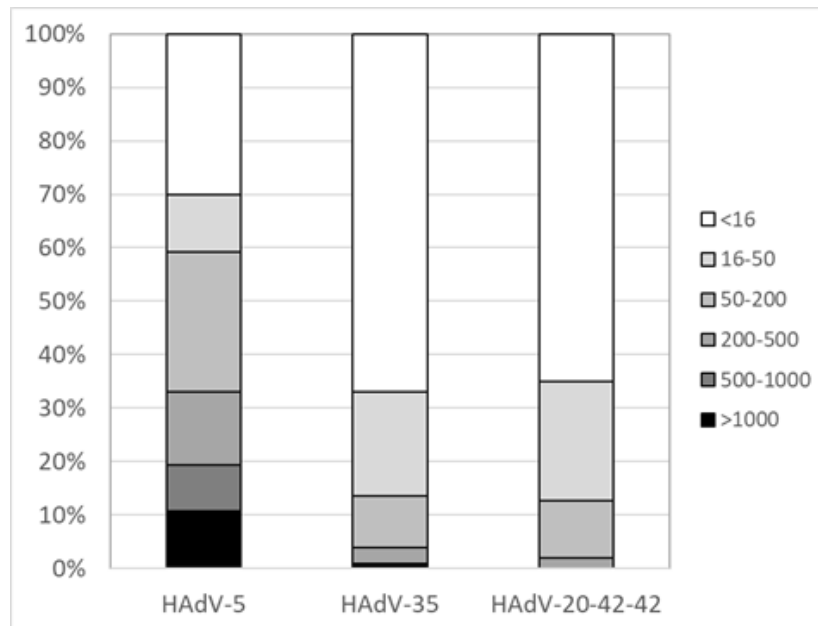

607

608 **Figure 2. HAdV-20-42-42 shows low seroprevalence in studies with human subjects.**

609 HAdV-5, HAdV-35 and HAdV-20-42-42 seroneutralization by a cohort of healthy >50-year-  
610 old US citizens ( $n=103$  individual serum samples). The neutralization titers were arbitrarily  
611 divided into the following categories: <16 (no neutralization), 16 to 300, 300 to 1,000, 1000 to  
612 4000 and >4000.

613 A

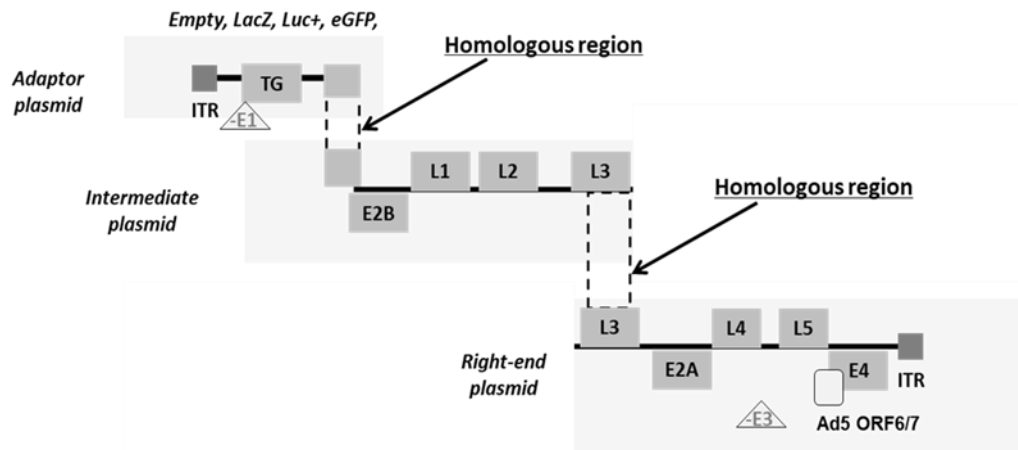

614

615

616 B

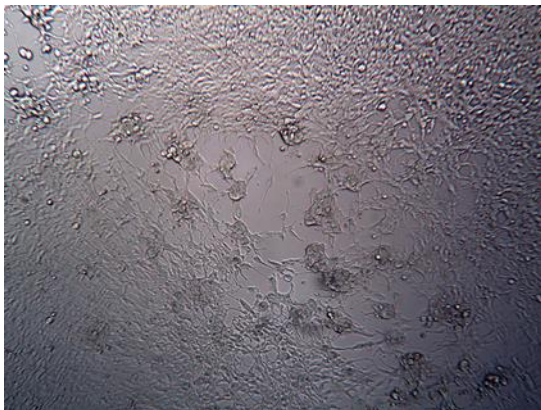

617

618

C

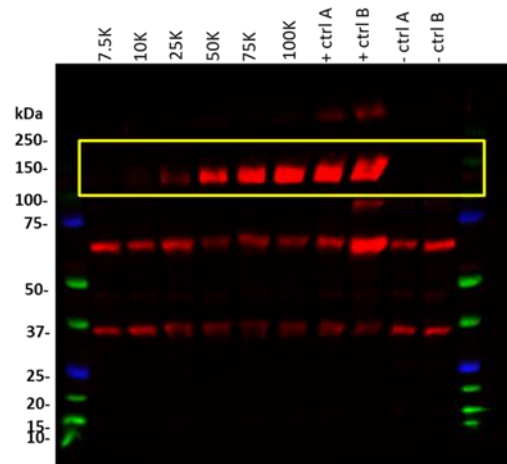

619 **Figure 3. HAdV-20-42-42 vector generation and characterization.**

620 A) Schematic representation of the replication-incompetent HAdV-20-42-42 recombinant viral  
621 vector construction strategy with a three-plasmid system (adaptor, intermediate and right-end  
622 plasmid). Overlapping regions allowed homologous recombination events between the HAdV-  
623 20-42-42 sequences in HEK293 production cell line. E and L represent the “early” and “late”  
624 genes of the adenoviral genome, ITRs are the inverted terminal repeats at the 5’ and 3’ ends. B)  
625 CPE development in HEK293 cells upon transfection of three HAdV-20-42-42 plasmids. C)  
626 Verification of transgene (LacZ) expression. A549 cells were infected with HAdV-20-42-42-

627 LacZ at various MOIs (indicated as vp per well). At 3 dpi cells were lysed and subjected to  
628 Western Blot analysis with an antibody against LacZ. The LacZ-specific bands are marked by  
629 a yellow rectangle. Lysates of a previous HAdV-20-42-42-LacZ infection were used as controls  
630 (+ ctrl A and B), while lysates of HAdV-20-42-42-GFP infected cells (- ctrl A) or uninfected  
631 cells (- ctrl B) were used as negative controls.

632 **A**

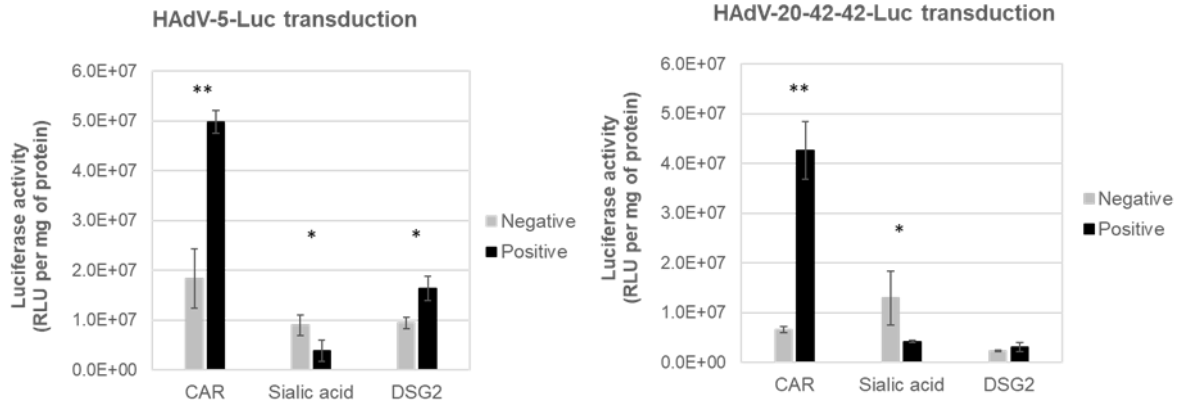

633

634 **B**

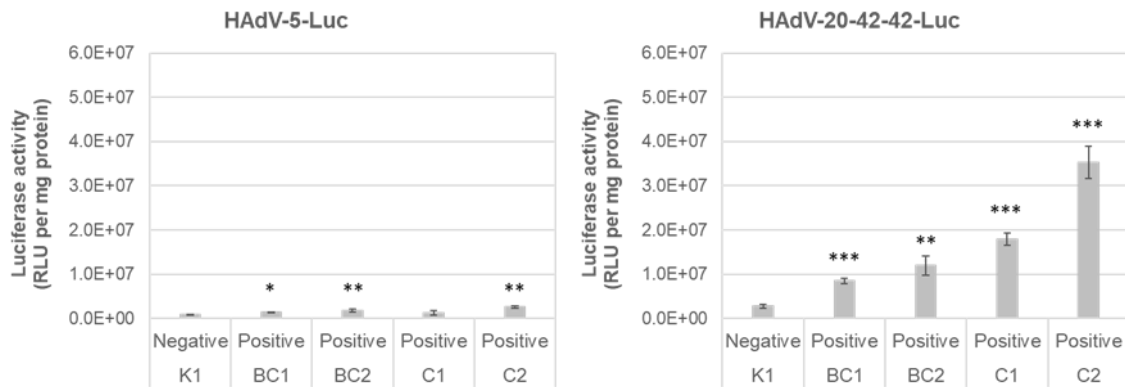

635

636

637 **Figure 4. Receptor usage of HAdV-20-42-42.**

638 **A)** Cells expressing (positive, dark gray bars) or lacking (negative, light gray bars) CAR, sialic

639 acid-containing glycans or DSG2 receptors were infected with HAdV-20-42-42-Luc or HAdV-

640 5-Luc as a control vector. **B)** CHO cells lacking CD46 (K1) or expressing various CD46

641 isoforms (BC1, BC2, C1, or C2) were infected with HAdV-20-42-42-Luc or HAdV-5-Luc as

642 a control vector. **A, B)** One day post-infection, cells were lysed to determine intracellular

643 luciferase activity. Luciferase activity is presented as relative light units (RLU) per milligram

644 (mg) protein. All results represent averaged data from several times performed experiments,

645 with four replicates for each condition. Error bars are presented as standard error of the mean

646 (SEM). Two-sample, two-tailed Student's t-tests,  $p < 0.05$  was considered statistically



647 significant ( $p < 0.05^*$ ,  $p < 0.01^{**}$ ). Statistical significance was calculated for positive versus  
648 negative cells (**A**) or in comparison to the negative cell line K1 (**B**).

649 **A**

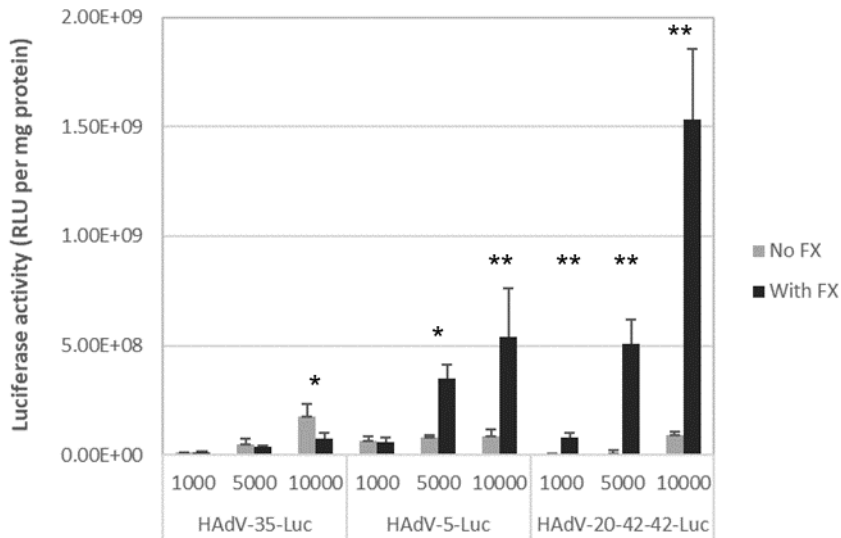

650

651 **B**

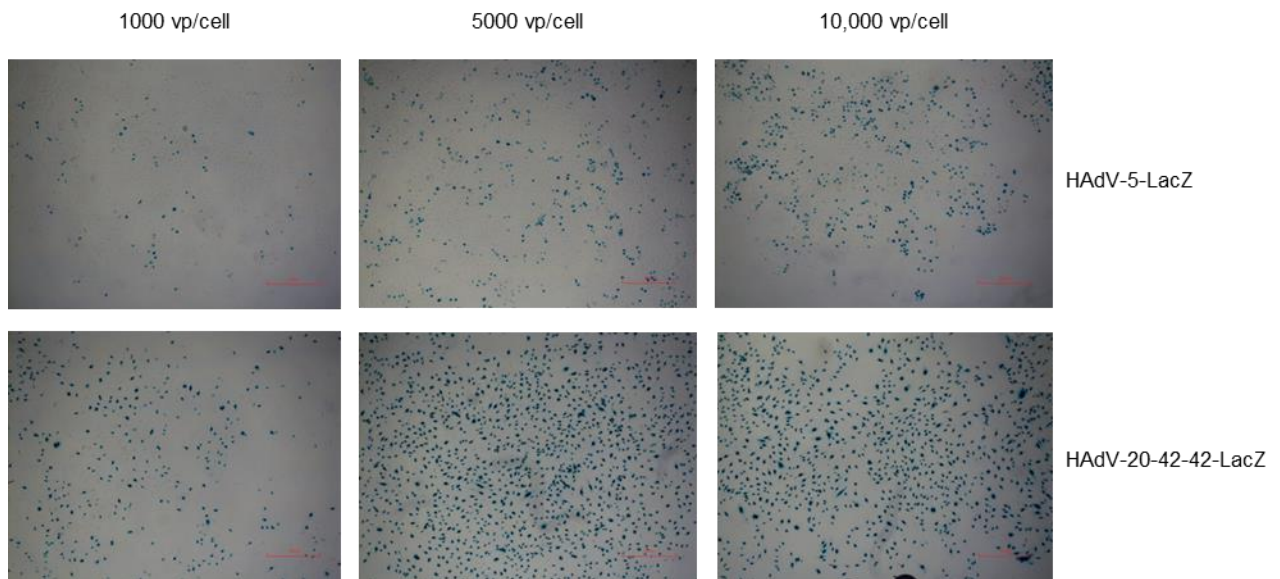

652

653

654 **Figure 5. Transduction efficiency of HAdV-20-42-42 in vascular cells.**

655 HAdV-20-42-42-Luc and -LacZ vectors were tested for transduction capacity in HSVEC  
656 (human saphenous vein endothelial cells). **A**) HSVEC were infected with HAdV-20-42-42-  
657 Luc or the control vectors HAdV-35-Luc and HAdV-5-Luc at various doses (1000, 5000, or  
658 10000 vp/cell) for 3 hours. Where indicated (dark gray bars), the vectors were incubated for 30  
659 min at 37°C with a physiological concentration of 10 µg/ml blood coagulation factor FX prior

660 to addition to the cells. After 2 days, cells were lysed to measure intracellular luciferase activity,  
661 which is presented as relative light units (RLU) per milligram (mg) protein. Bars represent the  
662 means plus standard errors of the means (SEM) (error bars) for quadruplicate values. Two-  
663 sample, two-tailed Student's t-tests,  $p < 0.05$  was considered statistically significant ( $p < 0.05^*$ ,  
664  $p < 0.01^{**}$ ). All results represent averaged data from several experiments, with four replicates  
665 for each condition. **B)** HSVEC were infected with various doses of HAdV-20-42-42-LacZ or  
666 HAdV-5-LacZ in the presence of FX. After 2 days, cells were stained for LacZ expression.

667 A

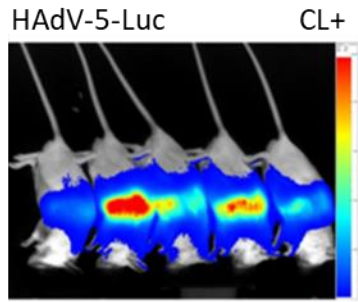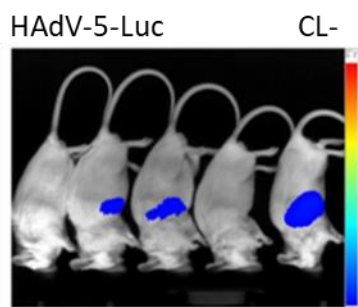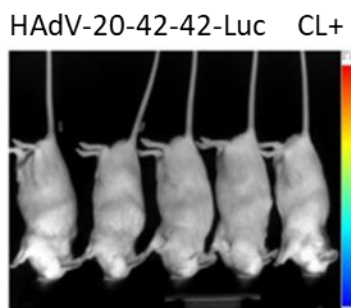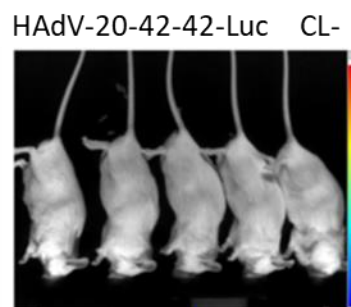

B

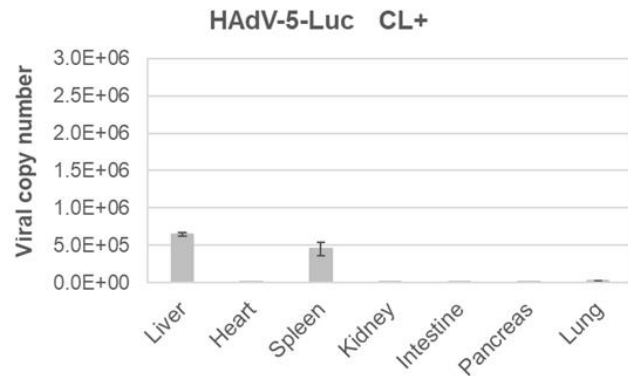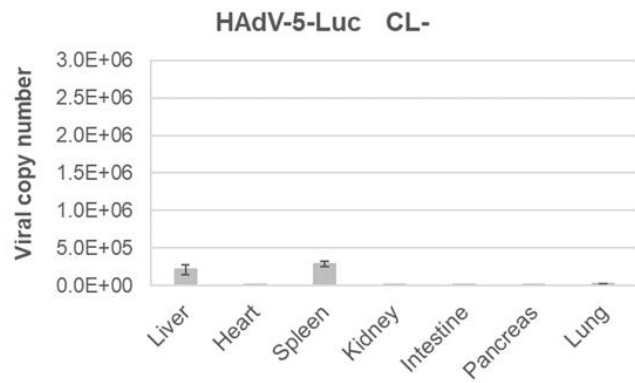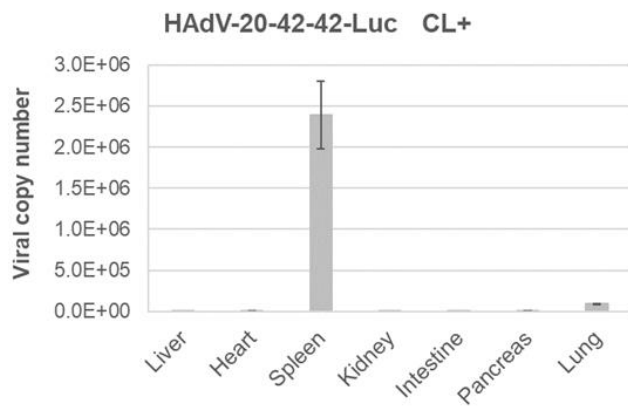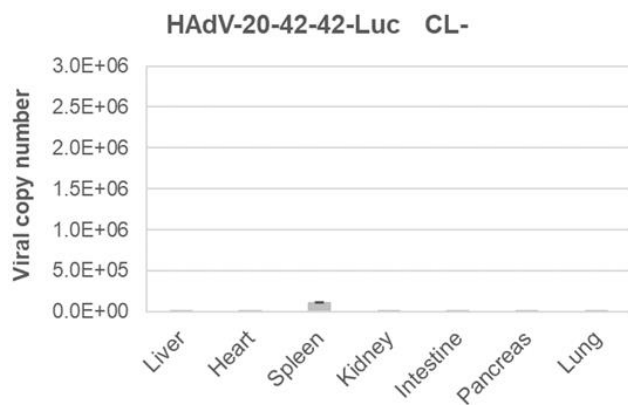

668

669 **Figure 6. Biodistribution profile of HAdV-20-42-42 shows mainly spleen tropism.**

670 Mice were pre-treated with clodronate (CL+) or untreated (CL-) and injected intravenously  
671 with HAdV-5-Luc or HAdV-20-42-42-Luc vectors. **A)** At 48 hours post virus delivery,  
672 luciferin was injected to the mice and luciferase activity was imaged with the method IVIS  
673 Spectrum, which ranged from low activity (shown in blue) to high activity (shown in red)  
674 levels. **B)** After imaging, animals were sacrificed and organs were collected to determine  
675 adenoviral genome copy numbers with qPCR. Data represent viral copy number per 100 ng of  
676 total DNA. Bars represent the means plus standard errors of the means (SEM).

677 **A**

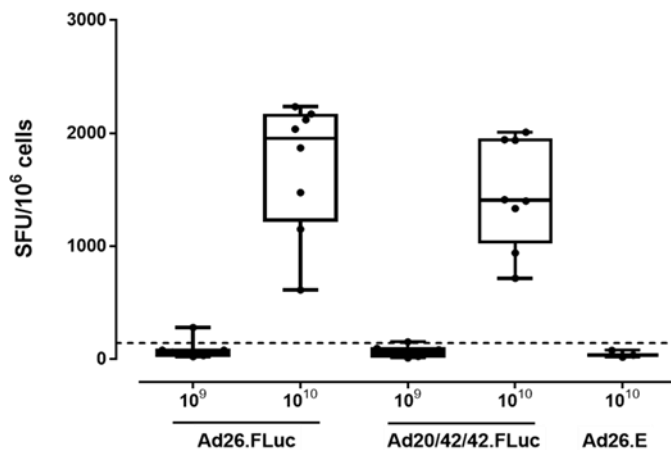

678

679 **B**

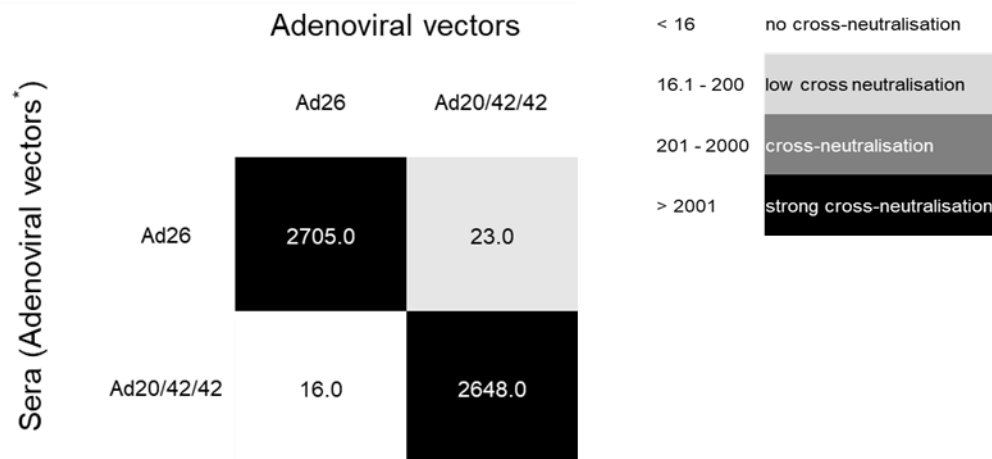

680

681

682 **Figure 7. Candidate vector HAdV-20-42-42 elicits strong immune response in mice.**

683 **A)** Cellular immune response in mice. Balb/C mice were immunized by intramuscular injection  
 684 with HAdV-26-Luc, HAdV-20-42-42-Luc, or with HAdV-26-E that lacks a transgene. Two  
 685 vector doses, i.e. 10<sup>9</sup> and 10<sup>10</sup> viral particles per mouse, were administered and animals were  
 686 sacrificed two weeks post immunization and sampled for serum and splenocytes. Cellular  
 687 immune responses against the vector-encoded antigen was evaluated by Luc specific-IFN- $\gamma$   
 688 ELISPOT assay. To this end, splenocytes were stimulated overnight with a 15mer overlapping  
 689 Luc peptide pool. The antigen specific immune responses were determined by measuring the

690 relative number of IFN- $\gamma$ -secreting cells. shown as Spot Forming Units (SFU) per million cells.  
691 Each dot represents a mouse, the bar indicates the geometric mean and the dotted line is the  
692 95<sup>th</sup> percentile based on the medium control samples. **B)** Cross-neutralization between HAdV-  
693 20-42-42 and HAdV-26. Mice antisera against hAd20V-42-42 and HAdV-26 were cross-tested  
694 against both vectors in an adenovirus neutralization assay. Starting from a 1:16 dilution, the  
695 sera were 2-fold serially diluted, then pre-mixed with the adenoviral vectors expressing  
696 luciferase, and subsequently incubated overnight with A549 cells at MOI 500 virus particles.  
697 Luciferase activity levels in infected cell lysates measured 24 hours post-infection represented  
698 vector infection efficiencies. The neutralization titers were arbitrarily divided into the  
699 categories shown in the legend on the right.
